# Supplementary material
Source: PubMed Central journal article supplement (PMC2806732)
Supplement: 0907658106_pnas.200907658SI.pdf [file 0907658106_pnas.200907658SI.pdf]

# Supporting Information

Buffalo et al. 10.1073/pnas.0907658106

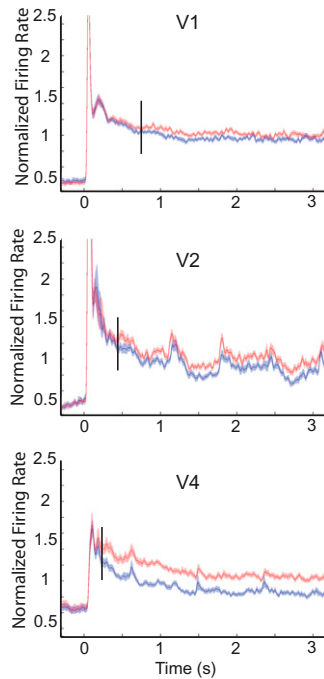

**Fig. S1.** Latency of attentional modulation of firing rate across all neurons in areas V1, V2, and V4. Red traces are spike density plots of the average population response with attention directed INTO the neuron's RF. Blue traces are responses with attention directed OUT of the RF. Responses are aligned to the stimulus onset (0) and have been smoothed with a Gaussian window of 30 ms. Shaded areas represent SEM. Vertical black lines represent the onset of the attentional modulation in each area.

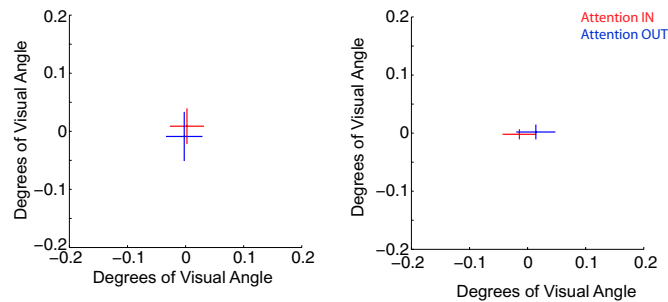

**Fig. S2.** Eye position during fixation across attentional conditions. For recordings in V1, the average eye position during fixation in the attention IN condition (red) and attention OUT condition (blue) is shown for each monkey separately.
